# Supplementary material for: DGLinker: flexible knowledge-graph prediction of disease–gene associations
Source: PubMed Central journal article supplement (PMC8262728; doi:10.1093/nar/gkab449), 2021-06-14
Supplement: gkab449_supplemental_file.pdf [file gkab449_supplemental_file.pdf]

## Supplementary data of:

### DGLinker: flexible knowledge-graph prediction of disease-gene associations

Jiajing Hu<sup>1,2,\*</sup>, Rosalba Lepore<sup>3,\*</sup>, Richard Dobson<sup>1,4,5</sup>, Ammar Al-Chalabi<sup>2,6</sup>, Daniel Bean<sup>1,4,\*</sup>, and Alfredo Iacoangeli<sup>1,2,7,\*,#</sup>

<sup>1</sup> Department of Biostatistics and Health Informatics, Institute of Psychiatry, Psychology & Neuroscience, King's College London, London, UK; <sup>2</sup> Department of Basic and Clinical Neuroscience, Maurice Wohl Clinical Neuroscience Institute, Institute of Psychiatry, Psychology & Neuroscience, King's College London, London, UK; <sup>3</sup>BSC-CNS Barcelona Supercomputing Center, Barcelona, Spain; <sup>4</sup>Health Data Research UK London, University College London, London, UK; <sup>5</sup> Institute of Health Informatics, University College London, London, UK; <sup>6</sup> King's College Hospital, Bessemer Road, Denmark Hill, Brixton, London SE5 9RS, London, UK; <sup>7</sup>National Institute for Health Research Biomedical Research Centre and Dementia Unit at South London and Maudsley NHS Foundation Trust and King's College London, London, UK.

**Keywords:** knowledge-graph, gene prioritization, machine learning, human disease.

\*These authors contributed equally

#Correspondance should be addressed to [alfredo.iacoangeli@kcl.ac.uk](mailto:alfredo.iacoangeli@kcl.ac.uk)

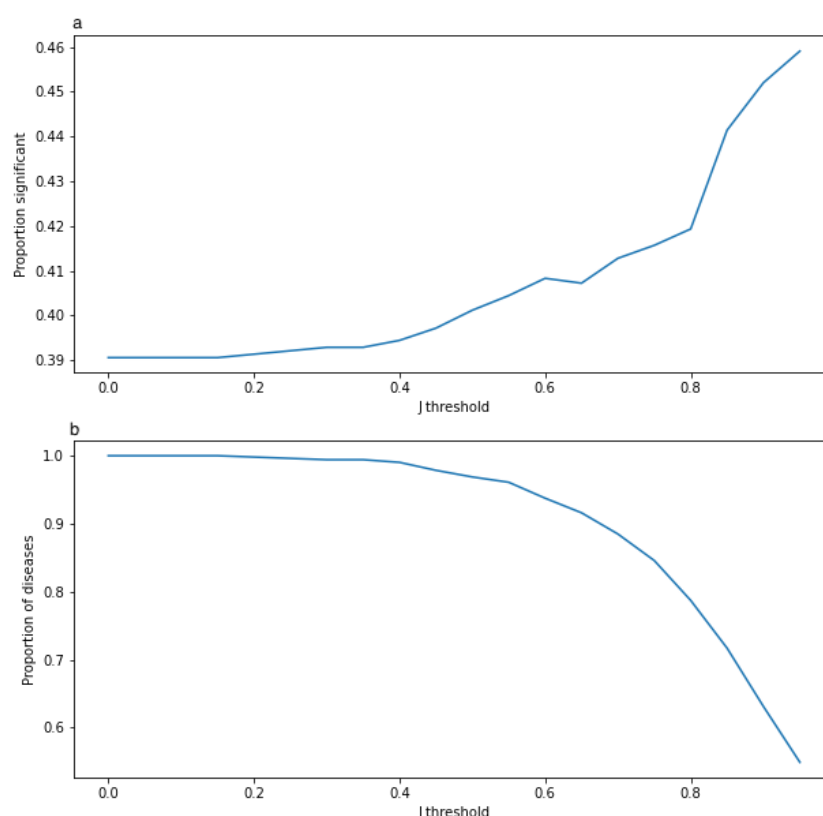

Supplementary figure 1. Effect of J-statistic threshold on model validation and number of models. Analysis performed for all 512 diseases for which the external validation had sufficient statistical power. A) proportion of models with training  $J \geq$  threshold that are significant. B) proportion of models retained with training  $J \geq$  threshold.

| <b>J threshold</b> | <b>Proportion significant at threshold</b> | <b>Number at threshold</b> | <b>Proportion at threshold</b> |
|--------------------|--------------------------------------------|----------------------------|--------------------------------|
| 0.00               | 0.39                                       | 512                        | 1.00                           |
| 0.05               | 0.39                                       | 512                        | 1.00                           |
| 0.10               | 0.39                                       | 512                        | 1.00                           |
| 0.15               | 0.39                                       | 512                        | 1.00                           |
| 0.20               | 0.39                                       | 511                        | 1.00                           |
| 0.25               | 0.39                                       | 510                        | 1.00                           |
| 0.30               | 0.39                                       | 509                        | 0.99                           |
| 0.35               | 0.39                                       | 509                        | 0.99                           |
| 0.40               | 0.39                                       | 507                        | 0.99                           |
| 0.45               | 0.40                                       | 501                        | 0.98                           |
| 0.50               | 0.40                                       | 496                        | 0.97                           |
| 0.55               | 0.40                                       | 492                        | 0.96                           |
| 0.60               | 0.41                                       | 480                        | 0.94                           |
| 0.65               | 0.41                                       | 469                        | 0.92                           |
| 0.70               | 0.41                                       | 453                        | 0.88                           |
| 0.75               | 0.42                                       | 433                        | 0.85                           |
| 0.80               | 0.42                                       | 403                        | 0.79                           |
| 0.85               | 0.44                                       | 367                        | 0.72                           |
| 0.90               | 0.45                                       | 323                        | 0.63                           |
| 0.95               | 0.46                                       | 281                        | 0.55                           |

Supplementary table 1. Effect of J-statistic threshold on validation performance. Analysis performed for all 512 diseases for which the external validation had sufficient statistical power. Models are retained if training  $J \geq$  threshold for each row.
